# Supplementary material for: Social and Cultural Experiences with Loyalty towards Hotel Services: The Mediating Role of Customer Satisfaction
Source: MDPI journal article supplement (doi:10.3390/su14148789), 2022-07-18
Supplement: s1 [file s1]

## RESEARCH QUESTIONNAIRE

### SOCIAL AND CULTURAL EXPERIENCES WITH LOYALTY TOWARDS HOTEL SERVICES: THE MEDIATING ROLE OF CUSTOMER SATISFACTION

**Instruction:** Kindly rate your personal experience with this hotel by indicating the extent of your agreement or disagreement with the statements based on the response scale provided below, by ticking (✓) on the appropriate option:

**Keys:** SA = Strongly Agree, A = Agree, FA = Fairly Agree, D = Disagree, and SD = Strongly Disagree

|    | Cultural Experience                                                                        | SA | A | FA | D | SD |
|----|--------------------------------------------------------------------------------------------|----|---|----|---|----|
| 1  | This hotel understands the taste of the local community.                                   |    |   |    |   |    |
| 2  | This hotel can cater to people of different cultural backgrounds.                          |    |   |    |   |    |
| 3  | The nature of the services in this hotel does not affect the customer's religious beliefs. |    |   |    |   |    |
| 4  | This hotel can offer quality meals for both Nigerians and foreigners.                      |    |   |    |   |    |
| 5  | Language is not a barrier for customers in this hotel.                                     |    |   |    |   |    |
| 6  | Customers can patronize this hotel in their different fashions and styles.                 |    |   |    |   |    |
|    | <b>Social Experience</b>                                                                   |    |   |    |   |    |
| 7  | I feel this hotel is a good place for me and my family to come and relax.                  |    |   |    |   |    |
| 8  | I feel this hotel is a good place for me and my friends to come and relax.                 |    |   |    |   |    |
| 9  | I patronize this hotel because I admire the quality of customers that visit this hotel.    |    |   |    |   |    |
| 10 | This hotel is a good place to meet important people.                                       |    |   |    |   |    |

#### Customer Satisfaction Towards Hotel Services

| S/N | STATEMENT                                                                  | SA | A | FA | D | SD |
|-----|----------------------------------------------------------------------------|----|---|----|---|----|
| 11  | The quality of food in this hotel is satisfactory.                         |    |   |    |   |    |
| 12  | I feel very comfortable in this hotel.                                     |    |   |    |   |    |
| 13  | I enjoy the atmosphere and environment of this hotel.                      |    |   |    |   |    |
| 14  | Overall, I am satisfied with the quality of the service in this hotel.     |    |   |    |   |    |
| 15  | I am satisfied with the friendliness displayed by the staff of this hotel. |    |   |    |   |    |
| 16  | I have no regrets patronizing this hotel.                                  |    |   |    |   |    |

#### Customer Loyalty Towards Hotel Services

| S/N | STATEMENT                                       | SA | A | FA | D | SD |
|-----|-------------------------------------------------|----|---|----|---|----|
| 17  | I will always continue to patronize this hotel. |    |   |    |   |    |

|    |                                                                                                                                     |  |  |  |  |  |
|----|-------------------------------------------------------------------------------------------------------------------------------------|--|--|--|--|--|
| 18 | I can recommend this hotel to anyone at any time on any day, based on my experience with the quality of the services in this hotel. |  |  |  |  |  |
| 19 | I will not switch to another hotel, even if they offer me discount, instead of this hotel.                                          |  |  |  |  |  |
| 20 | I do not mind to pay for extra charges because of the quality of the services I experienced in this hotel.                          |  |  |  |  |  |
| 21 | Any customer can rely on this hotel to link them with other hotels for any form of global transactions.                             |  |  |  |  |  |
